# Supplementary material
Source: publisher figshare collection journal article supplement (https://acs.figshare.com/ndownloader/files/27196999)
Supplement: Supplementary file 1 [file 27196999]

## Supplementary information

Table S1 lists the main review articles of recent years and their subsidiary information (the year up to which literature is covered, topic reviewed and refs), illustrating the complementary work and necessity of this review.

**Table S1. Summary of existing key review articles and supplementary work of this review**

| Number | Key review articles                                        | Subject reviewed                                                                                                                                                                                                                                                                                                   | Article information                 | Year up literature cove                                                                                            | Necessary supplement to our paper                                                                                                                                                                                                                                                                                                         |
|--------|------------------------------------------------------------|--------------------------------------------------------------------------------------------------------------------------------------------------------------------------------------------------------------------------------------------------------------------------------------------------------------------|-------------------------------------|--------------------------------------------------------------------------------------------------------------------|-------------------------------------------------------------------------------------------------------------------------------------------------------------------------------------------------------------------------------------------------------------------------------------------------------------------------------------------|
| 1      | Advances in direct NO <sub>x</sub> decomposition catalysts | The research progress of three catalysts for catalytic decomposition of NO are reviewed, including Cu-ZSM-5, perovskite-type and rare earth oxides, with a few summaries on the mechanism, and the tolerance of the catalyst in the coexistence of reactant gases O <sub>2</sub> and CO <sub>2</sub> is concerned. | Applied Catalysis A: General (2012) | Majority of the literatures involved are concentrated before 2000, and the minority are concentrated in 2000-2010. | The detailed data of NO emissions in China has been supplemented, the comparison of various de-NO <sub>x</sub> methods has been added, the research progress of other three types of catalysts for NO decomposition has been added, which include precious metals, hydrotalcite, and heteropoly acids, and both experiments and mechanism |
| 2      | A review on the catalytic                                  | The research progress of three catalysts for catalytic decomposition                                                                                                                                                                                                                                               | Catalysis Science & Technology      | Majority of the literatures                                                                                        |                                                                                                                                                                                                                                                                                                                                           |

decomposition of NO  
to N<sub>2</sub> and O<sub>2</sub>: catalysts  
and processes

of NO are reviewed, including metal  
oxide catalysts, supported metal  
oxide catalysts and Cu-ZSM-5, and  
the tolerance performance of them in  
coexisting reaction gases (including  
O<sub>2</sub>, H<sub>2</sub>O, and CO<sub>2</sub>) are compared.

(2018)

involved are  
concentrated  
in 2000-2010.

research on NO decomposition  
by Cu-ZSM-5 has been  
summarized in detail.

Recent Advances on  
Nitrous Oxide (N<sub>2</sub>O)  
Decomposition over  
NonNoble-Metal  
Oxide Catalysts:  
Catalytic Performance,  
Mechanistic  
Considerations, and  
Surface Chemistry  
Aspects

The research progress on the  
decomposition of N<sub>2</sub>O with non-  
noble metal oxide catalysts since  
2000 is reviewed. Including: pure  
oxide, hexaaluminate, hydrotalcite,  
spinel, perovskite, etc. The reaction  
mechanism, relationship between  
structure and activity, the role of  
various inhibitors (such as O<sub>2</sub>, NO,  
H<sub>2</sub>O) and the strategies for adjusting  
the local surface structure of MOs

ACS Catalysis  
(2015)

Majority of the  
literatures  
involved are  
concentrated  
in 2000-2014,  
and the  
minority are  
concentrated  
before 2000.

Some papers reported that N<sub>2</sub>O  
is an intermediate product in  
the decomposition of NO by  
catalysts such as Cu-ZSM-5,  
and some catalysts that are  
active in the decomposition of  
N<sub>2</sub>O are also effective for the  
decomposition of NO. The  
summary of this paper also  
benefits the research on N<sub>2</sub>O  
decomposition.

are reviewed.

|   |                                                                                                                          |                                                                                                                                                                                                                                                                                                                                                                                               |                                |                                                                        |                                                                                                                                                                                                                                                                                                                                |
|---|--------------------------------------------------------------------------------------------------------------------------|-----------------------------------------------------------------------------------------------------------------------------------------------------------------------------------------------------------------------------------------------------------------------------------------------------------------------------------------------------------------------------------------------|--------------------------------|------------------------------------------------------------------------|--------------------------------------------------------------------------------------------------------------------------------------------------------------------------------------------------------------------------------------------------------------------------------------------------------------------------------|
| 4 | <p>Selective Transformation of Various Nitrogen-Containing Exhaust Gases toward N<sub>2</sub> over Zeolite Catalysts</p> | <p>The research progress on the conversion of nitrogen-containing exhaust gas (HCN, CH<sub>3</sub>CN, C<sub>2</sub>H<sub>3</sub>CN, N<sub>2</sub>O, NO) to N<sub>2</sub> on zeolite catalysts is reviewed, and the physical and chemical properties of zeolite are introduced. For the removal of NO, two methods include catalytic reduction and catalytic decomposition are introduced.</p> | <p>Chemical Reviews (2016)</p> | <p>There are totally 335 references and concentrated in 2000-2015.</p> | <p>In addition to catalytic reduction and catalytic decomposition, other de-NO<sub>x</sub> methods such as adsorption, storage reduction and selective non-catalytic reduction are supplemented. The types of catalysts used for the catalytic decomposition of NO have been expanded, and Cu-ZSM-5 is further introduced.</p> |
| 5 | <p>Local Environment and Nature of Cu Active Sites in Zeolite-Based Catalysts for the Selective Catalytic</p>            | <p>The local environment of the key information copper species in the copper-based zeolite catalyst in the mobile source NH<sub>3</sub>-SCR technology is reviewed. Including Y, ZSM-5,</p>                                                                                                                                                                                                   | <p>ACS Catalysis (2013)</p>    | <p>The literature involved ranging from 1990 to 2012.</p>              | <p>The local environment and conversion mechanism of the copper species in Cu-ZSM-5 are the key and difficult points to study the mechanism of its</p>                                                                                                                                                                         |

|   |                                                                                                                                   |                                                                                                                                                                                                                                                             |                         |                                                                     |                                                                                                                                                                                                                                                 |
|---|-----------------------------------------------------------------------------------------------------------------------------------|-------------------------------------------------------------------------------------------------------------------------------------------------------------------------------------------------------------------------------------------------------------|-------------------------|---------------------------------------------------------------------|-------------------------------------------------------------------------------------------------------------------------------------------------------------------------------------------------------------------------------------------------|
|   | Reduction of NO <sub>x</sub>                                                                                                      | SSZ-13. The experiment and characterization methods used to study metal-containing zeolite catalysts are introduced.                                                                                                                                        |                         |                                                                     | catalytic reduction and catalytic decomposition of NO, and a review article studying this topic in the catalytic decomposition reaction has not appeared yet. The fourth part of our paper focuses on this content.                             |
| 6 | Cerium Oxide-Based Catalysts for Low-Temperature Selective Catalytic Reduction of NO <sub>x</sub> with NH <sub>3</sub> : A Review | E-R and L-H mechanisms of low-temperature NH <sub>3</sub> -SCR method are introduced, and the research progress of three Ce-based catalysts (single CeO <sub>x</sub> , multimetal oxides and multimetal oxides with support) in SCR reactions are reviewed. | Energy & Fuels (2021)   | Majority of the literatures involved are concentrated in 2010-2020. | SCR technology is the most mature de-NO <sub>x</sub> method for pollutant control in industrial boilers and diesel engines, and vanadium-based oxides and CHA zeolite catalysts have also been successfully applied in commercial applications. |
| 7 | Selective Catalytic Reduction of NO <sub>x</sub>                                                                                  | The NH <sub>3</sub> -SCR reaction and anti-poisoning mechanism are described,                                                                                                                                                                               | Chemical Reviews (2019) | There are totally 589                                               | However, considering other                                                                                                                                                                                                                      |

|   |                                                                                                                                                 |                                                                                                                                                                                                                                                                                                                                        |                                                             |                                                                                                            |                                                                                                                                                                                                       |
|---|-------------------------------------------------------------------------------------------------------------------------------------------------|----------------------------------------------------------------------------------------------------------------------------------------------------------------------------------------------------------------------------------------------------------------------------------------------------------------------------------------|-------------------------------------------------------------|------------------------------------------------------------------------------------------------------------|-------------------------------------------------------------------------------------------------------------------------------------------------------------------------------------------------------|
|   | with NH <sub>3</sub> by Using<br>Novel Catalysts: State<br>of the Art and Future<br>Prospects                                                   | and the research progress of new<br>SCR catalysts are reviewed,<br>including VO <sub>x</sub> , MnO <sub>x</sub> , CeO <sub>2</sub> , Fe <sub>2</sub> O <sub>3</sub> ,<br>CuO, acidic compound catalysts<br>containing vanadate, phosphate and<br>sulfate catalysts, and ion exchanged<br>zeolite catalysts such as Fe, Cu, Mn,<br>etc. |                                                             | references and<br>the majority<br>concentrated<br>in 2000-2019,<br>the minority<br>existed before<br>2000. | sources of NO production and<br>the drawbacks of SCR itself, it<br>is necessary to introduce and<br>develop other de-NO <sub>x</sub> methods,<br>this work has not been<br>reviewed and reported yet. |
| 8 | Recent Progress and<br>Future Challenges in<br>Selective Catalytic<br>Reduction of NO by<br>H <sub>2</sub> in the Presence of<br>O <sub>2</sub> | The mechanism of the H <sub>2</sub> -SCR<br>reaction is reviewed, the influence<br>and effect of the catalyst on the<br>reaction activity are reviewed, and<br>the influence of exhaust gas<br>components on the reaction is<br>focused from a practical point of<br>view.                                                             | Industrial &<br>Engineering<br>Chemistry<br>Research (2019) | Majority of the<br>literatures<br>involved are<br>concentrated<br>in 2000-2019.                            |                                                                                                                                                                                                       |
| 9 | A Perspective on the                                                                                                                            | The research progress of commercial                                                                                                                                                                                                                                                                                                    | ACS Catalysis                                               | It's a huge time                                                                                           | The industry in this review                                                                                                                                                                           |

|                                                                                                                                                       |                                                                                                                                                                                                                                                                                                                                                                          |                                                              |                                                                        |                                                                                                                                                                                                                                                                                                                                                                   |
|-------------------------------------------------------------------------------------------------------------------------------------------------------|--------------------------------------------------------------------------------------------------------------------------------------------------------------------------------------------------------------------------------------------------------------------------------------------------------------------------------------------------------------------------|--------------------------------------------------------------|------------------------------------------------------------------------|-------------------------------------------------------------------------------------------------------------------------------------------------------------------------------------------------------------------------------------------------------------------------------------------------------------------------------------------------------------------|
| <p>Selective Catalytic Reduction (SCR) of NO with NH<sub>3</sub> by Supported V<sub>2</sub>O<sub>5</sub>-WO<sub>3</sub>/TiO<sub>2</sub> Catalysts</p> | <p>V<sub>2</sub>O<sub>5</sub> WO<sub>3</sub>/TiO<sub>2</sub> catalyst of NH<sub>3</sub>-SCR technology in industrial boiler is introduced. The perspective includes molecular structures of titaniasupported vanadium and tungsten oxide species, surface acidity, catalytic active sites, surface reaction intermediates, reaction mechanism and reaction kinetics.</p> | <p>(2018)</p>                                                | <p>span, literatures before 2000 accounted for a large proportion.</p> | <p>only includes industrial boilers, and the catalyst is only for V<sub>2</sub>O<sub>5</sub> WO<sub>3</sub>/TiO<sub>2</sub>. We hope to cover as many de-NO<sub>x</sub> methods and catalyst types as possible to improve the scientificity and comprehensiveness of our review and provide a reference for readers who are initially studying in this field.</p> |
| <p>Review of recent after-treatment technologies for DE-NO<sub>x</sub> process in diesel engines</p>                                                  | <p>Four mostly representative catalytic treatment technologies for diesel vehicles are reviewed, including LNT+SCR, Urea/NH<sub>3</sub>-SCR, HC-SCR, and CO/H<sub>2</sub>-SCR. The focus is the progress of the mechanism and</p>                                                                                                                                        | <p>International Journal of Automotive Technology (2020)</p> | <p>Literatures involved ranging from 1990 to 2020.</p>                 | <p>The de-NO<sub>x</sub> conditions for diesel vehicles differs significantly from that of industrial boilers, and catalytic decomposition method is worth considering in the field of</p>                                                                                                                                                                        |

|    |                                                                                                                          |                                                                                                                                                                                                        |                         |                                                                                                                |                                                                                                                                                                                                                                                                                 |
|----|--------------------------------------------------------------------------------------------------------------------------|--------------------------------------------------------------------------------------------------------------------------------------------------------------------------------------------------------|-------------------------|----------------------------------------------------------------------------------------------------------------|---------------------------------------------------------------------------------------------------------------------------------------------------------------------------------------------------------------------------------------------------------------------------------|
|    |                                                                                                                          | the challenges it faces, and the activity, hydrothermal stability and anti-poisoning performance are also summarized.                                                                                  |                         |                                                                                                                | diesel vehicle de-NO <sub>x</sub> . Zeolite catalysts are commonly used catalysts in SCR technology of diesel vehicle, and the state of copper species in the Cu-ZSM-5 catalyst is summarized which also conducive to clarifying the mechanism of Cu-ZSM-5 in the SCR reaction. |
| 11 | Catalytic NO <sub>x</sub> Abatement Systems for Mobile Sources: From Three-Way to Lean Burn After-Treatment Technologies | The research progress and ideas of three-way, SCR and NSR de-NO <sub>x</sub> methods are reviewed, and the impact on SCR when using biodiesel and synthetic Gas-to liquid as fuel are also summarized. | Chemical Reviews (2011) | There are totally 542 references and the majority concentrated in 2000-2010, the minority existed before 2000. |                                                                                                                                                                                                                                                                                 |

|                                                                                                                                                                            |                                                                                                                                                                                                                                                          |                                    |                                                                                                                           |                                                                                                                                                                                                                                                                                                                                                                                                                                                                              |
|----------------------------------------------------------------------------------------------------------------------------------------------------------------------------|----------------------------------------------------------------------------------------------------------------------------------------------------------------------------------------------------------------------------------------------------------|------------------------------------|---------------------------------------------------------------------------------------------------------------------------|------------------------------------------------------------------------------------------------------------------------------------------------------------------------------------------------------------------------------------------------------------------------------------------------------------------------------------------------------------------------------------------------------------------------------------------------------------------------------|
| <p>12</p> <p>SO<sub>x</sub>/NO<sub>x</sub> Removal<br/>from Flue Gas Streams<br/>by Solid Adsorbents:<br/>A Review of Current<br/>Challenges and Future<br/>Directions</p> | <p>The removing of SO<sub>x</sub>/NO<sub>x</sub> in flue gas by adsorption is reviewed, and the characteristics of solid adsorbent materials are discussed, as well as their applications in traditional and emerging acid gas removal technologies.</p> | <p>Energy&amp;Fuels<br/>(2015)</p> | <p>Majority of the literatures involved are concentrated in 2000-2014, and the minority are concentrated before 2000.</p> | <p>The adsorption method is only one of many denitrification methods, and since the application background of this article review is power station, the introduction of liquid absorption method is not carried out. We reviewed the research progress of adsorption method including solid and liquid comprehensively, and introduced new developments in recent years, such as adsorption method and technology combining catalytic reduction and catalytic oxidation.</p> |
|----------------------------------------------------------------------------------------------------------------------------------------------------------------------------|----------------------------------------------------------------------------------------------------------------------------------------------------------------------------------------------------------------------------------------------------------|------------------------------------|---------------------------------------------------------------------------------------------------------------------------|------------------------------------------------------------------------------------------------------------------------------------------------------------------------------------------------------------------------------------------------------------------------------------------------------------------------------------------------------------------------------------------------------------------------------------------------------------------------------|

---
